# Supplementary material for: Role of oxadiazole moiety in different D–A polyazothines and related resistive switching properties
Source: Royal Society of Chemistry journal article supplement (doi:10.1039/c3tc30826j), 2013-01-01
Supplement: c3tc30826j.pdf [file c3tc30826j.pdf]

*Electronic Supplementary Information for*

**Different Resistive Switching Properties in D-A Polyazothines Based  
on Triphenylamine, Oxadiazole and 3,3'-dinitro-diphenylsulfone  
Moieties**

**Liang Pan,<sup>abc</sup> Benlin Hu,<sup>ab</sup> Xiaojian Zhu,<sup>ab</sup> Xinxin Chen,<sup>ab</sup> Jie Shang,<sup>ab</sup> Hongwei Tan,<sup>ab</sup> Wuhong Xue,<sup>ab</sup> Yuejin Zhu,<sup>c</sup> Gang Liu,<sup>\*ab</sup> and Run-Wei Li<sup>\*ab</sup>**

<sup>a</sup> *Key Laboratory of Magnetic Materials and Devices, Ningbo Institute of Material Technology and Engineering, Chinese Academy of Sciences, Ningbo 315201, China.  
E-mail: [liug@nimte.ac.cn](mailto:liug@nimte.ac.cn); [runweili@nimte.ac.cn](mailto:runweili@nimte.ac.cn). Fax: +86-574-8668-5163; Tel: +86-574-86685134;*

<sup>b</sup> *Zhejiang Province Key Laboratory of Magnetic Materials and Application Technology, Ningbo Institute of Material Technology and Engineering, Chinese Academy of Sciences, Ningbo 315201, China*

<sup>c</sup> *Department of Physics, Ningbo University, Ningbo 315211, China*

Email: [liug@nimte.ac.cn](mailto:liug@nimte.ac.cn); [runweili@nimte.ac.cn](mailto:runweili@nimte.ac.cn)

**Table of contents**

|                                                                               |       |
|-------------------------------------------------------------------------------|-------|
| 1. Calculation of molecular orbital energy levels and energy band gap of PAs. | S2-S3 |
| 2. FT-IR spectra of PA-1 and PA-2.                                            | S4-S5 |
| 3. TGA and DSC curves of PA-1 and PA-2.                                       | S6-S7 |
| 4. Retention performance of the Pt/PA-1/Pt devices.                           | S8    |
| 5. Retention performance of the Al/PAs/Pt devices.                            | S9    |
| 6. References                                                                 | S10   |

### Calculation of molecular orbital energy levels and energy band gap of PAs:

$$E_g = \frac{hc}{\lambda_{\text{onset}}} \quad (\text{S1})$$

$$E_{\text{HOMO}} = -(E_{\text{onset}}(\text{OX}) + 4.8 - E_{\text{FOC}}) \quad (\text{S2})$$

$$E_{\text{LUMO}} = E_{\text{onset}}(\text{RED}) + 4.8 - E_{\text{FOC}} \quad (\text{S3})$$

$$E_{\text{LUMO}} = E_{\text{HOMO}} + E_g \quad (\text{S4})$$

where  $E_g$  is the optical band gap of the polymers,  $h$  is the Planck constant ( $6.63 \times 10^{-34}$  m<sup>2</sup>kg/s),  $c$  is the speed of light ( $3 \times 10^8$  m/s),  $\lambda_{\text{onset}}$  is the onset optical absorbance wavelength of the polymers,  $E_{\text{HOMO}}$  and  $E_{\text{LUMO}}$  are the HOMO and LUMO energy levels,  $E_{\text{onset}}(\text{OX})$  is the onset oxidation potential of the polymers,  $E_{\text{onset}}(\text{RED})$  is the onset reduction potential of the polymers, 4.8 is the reference energy level of ferrocene (FOC, 4.8 eV below the vacuum level) and  $E_{\text{FOC}}$  is the potential of FOC/FOC<sup>+</sup> vs. Ag/AgCl (0.38 eV, as measured by cyclic voltammetry). Based on the  $E_{\text{onset}}(\text{OX})$  and  $\lambda_{\text{onset}}$  of PA-1, the HOMO level and optical band gap are calculated to be -5.05 eV and 2.88 eV, respectively, according to **Equations S1 and S2**. Therefore, the LUMO level of PA-1 is deduced to be -2.17 eV with **Equation S4**. Here, the optical energy band gap is used to calculate the LUMO level. However, as PA-1 also exhibits reduction peak in the cyclic voltammetry (CV) measurements, the LUMO level can be obtained from the electrochemical data directly by using **Equation S3**, which is -3.62 eV and close to our previous value. The corresponding energy band gap of PA-1 is then 1.43 eV and much different from 2.88 eV of the optical band gap. It is a common sense that the optical band gap of a polymeric material is different

from its energy band gap.<sup>1,2</sup> Also, as the molecular simulation of the basic unit (BU) of the polymer does not consider the effect of  $\pi$  conjugation of the macromolecule chains, the simulated energy levels of the BU, in particular the LUMO level, usually shows some deviation from the experimental value.<sup>3,4</sup> On the other hand, as PA-2 only exhibits reduction behavior in the CV profile, the LUMO level (-3.57 eV) has to be calculated using **Equation S3** with its  $E_{onset}(RED)$  of -0.85 V. With the optical band gap of 3.13 eV as derived from the onset optical absorbance wavelength of 397 nm from **Equation S1**, PA-2 shows a HOMO level of -6.70 eV as deduced from **Equation S4**.

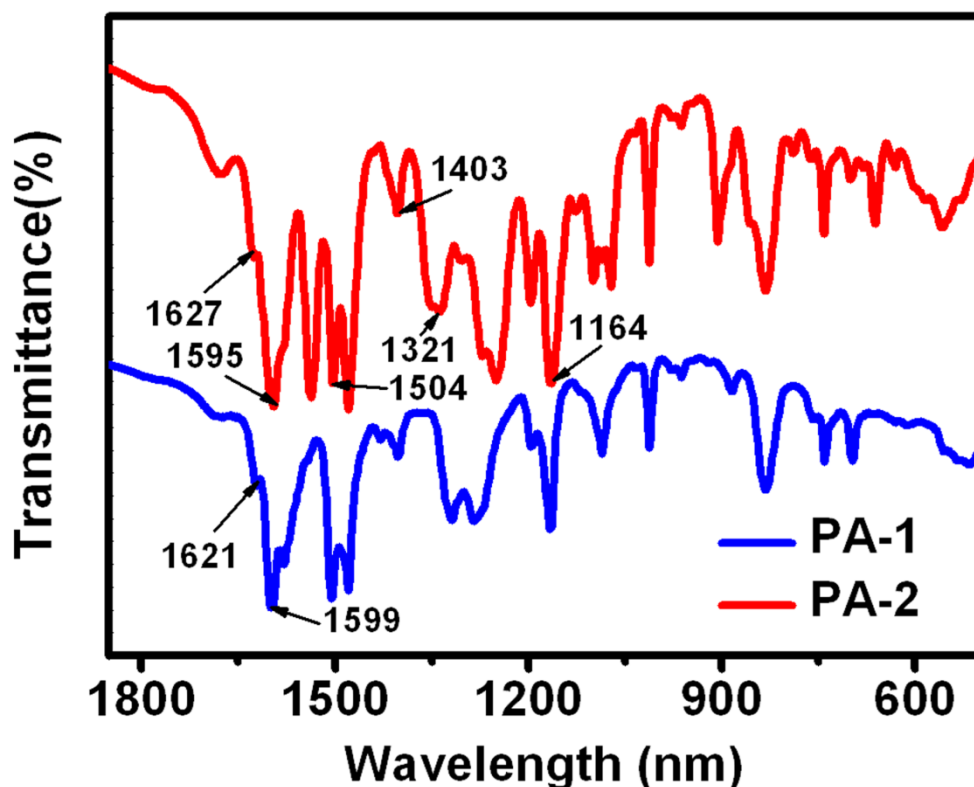

**Figure S1** FT-IR spectra of PA-1 and PA-2.

The diamine monomer M1 was synthesized by the nucleophilic reaction between p-aminothiophenol and 2,5-bis(4-fluorophenyl)-1,3,4-oxadiazole with a yield of 76.8%. Similarly, the dialdehyde monomer, bis-(3-nitro-4-p-formylphenoxy-phenyl) sulfone, was synthesized with a yield of 81.2%. As shown in Scheme 1, the two poly(schiff base)s were obtained by polycondensation of M1 and the corresponding dialdehyde monomers. The chemical structures of the PAs were confirmed by  $^1\text{H}$  NMR and FT-IR spectra. The weak absorption peaks at  $1621\text{ cm}^{-1}$  and  $1627\text{ cm}^{-1}$  are the characteristic signals of C=N stretching in the oxadiazole unities. The peaks at around  $1599\text{ cm}^{-1}$  and  $1595\text{ cm}^{-1}$  are attributed to the vibrating stretching of C=N in the imine moieties of the as-synthesized schiff bases. The characteristic magnetic

resonance signals of the CH=N moieties are observed with the chemical shifts of 10.14 ppm and 10.10 ppm, respectively, in the  $^1\text{H}$  NMR spectra of the PAs. Both PAs exhibit good room-temperature solubility in common solvent, such as cyclohexanone, DMF and NMP, and the inherent viscosity of PA-1 and PA-2 are 0.45 and 0.51 dL/g in NMP, respectively.

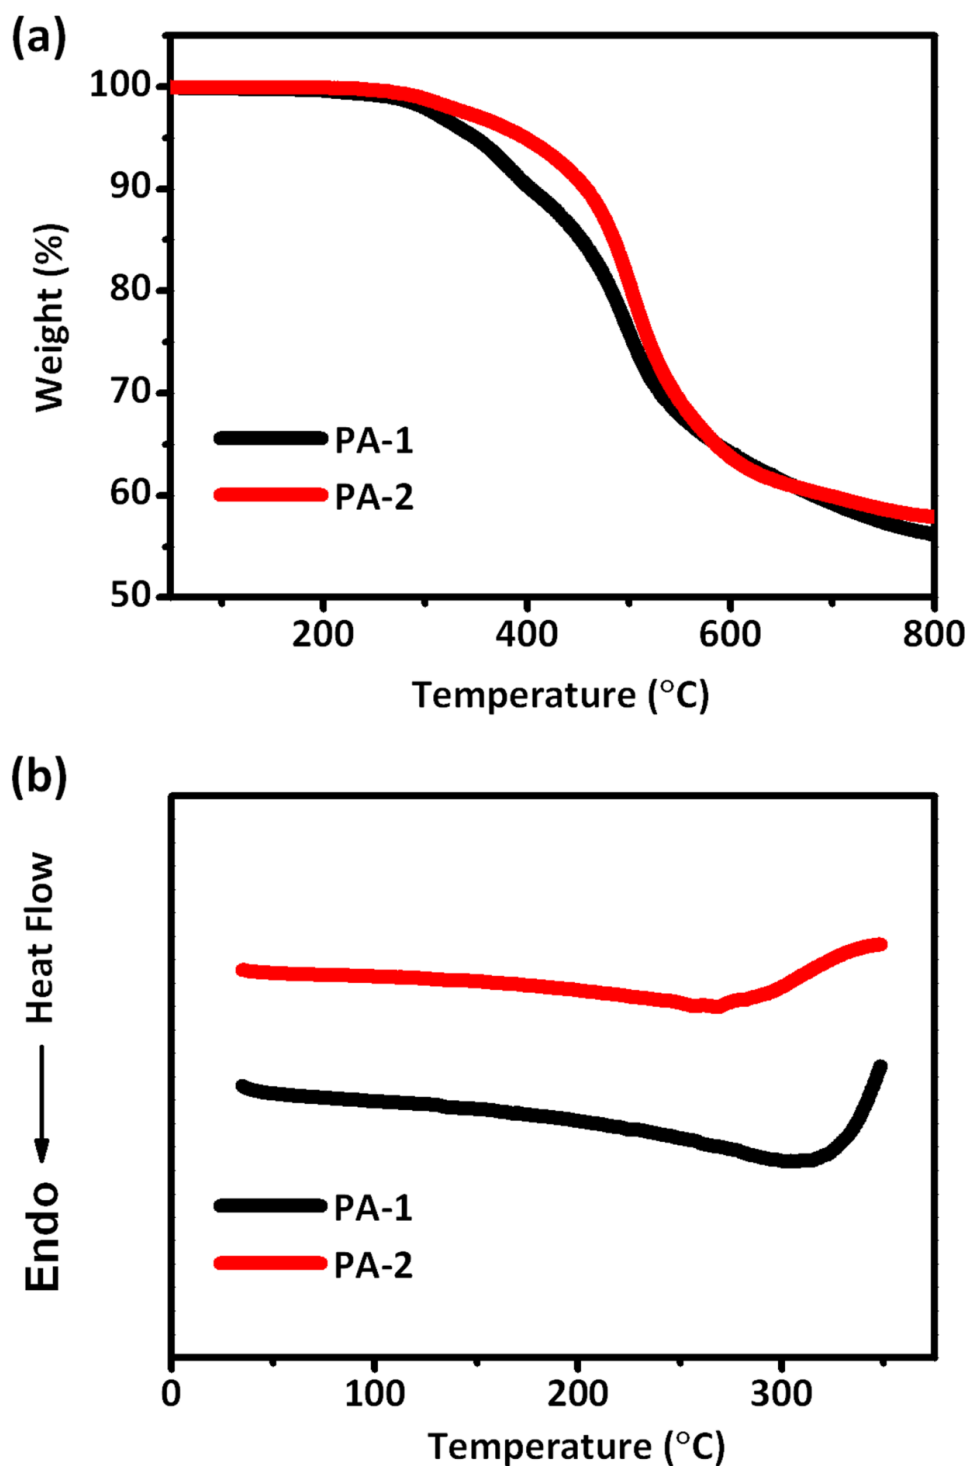

**Figure S2** (a) TGA and (b) DSC curves of PA-1 and PA-2 in nitrogen.

The thermal properties of the PAs were evaluated by DSC and TGA analysis as shown in Figure S2. The onset thermal degradation temperatures ( $T_d(10\%)$ ) and glass transition temperatures ( $T_g$ ) of PA-1 and PA-2 are 404 °C/326 °C and 458 °C/279 °C,

respectively. The  $T_g$  of PA-1 is higher than that of PA-2, and is in accordance with the fact that the molecular size of the PA-1 dialdehyde moiety is larger than that of PA-2 dialdehyde moiety. The good solubility and moderate viscosity of both polymers promise them excellent solution processability for easy device fabrication, while the thermal stability of either PA-1 or PA-2 is highly desired for achieving high endurance of the polymer electronic devices.

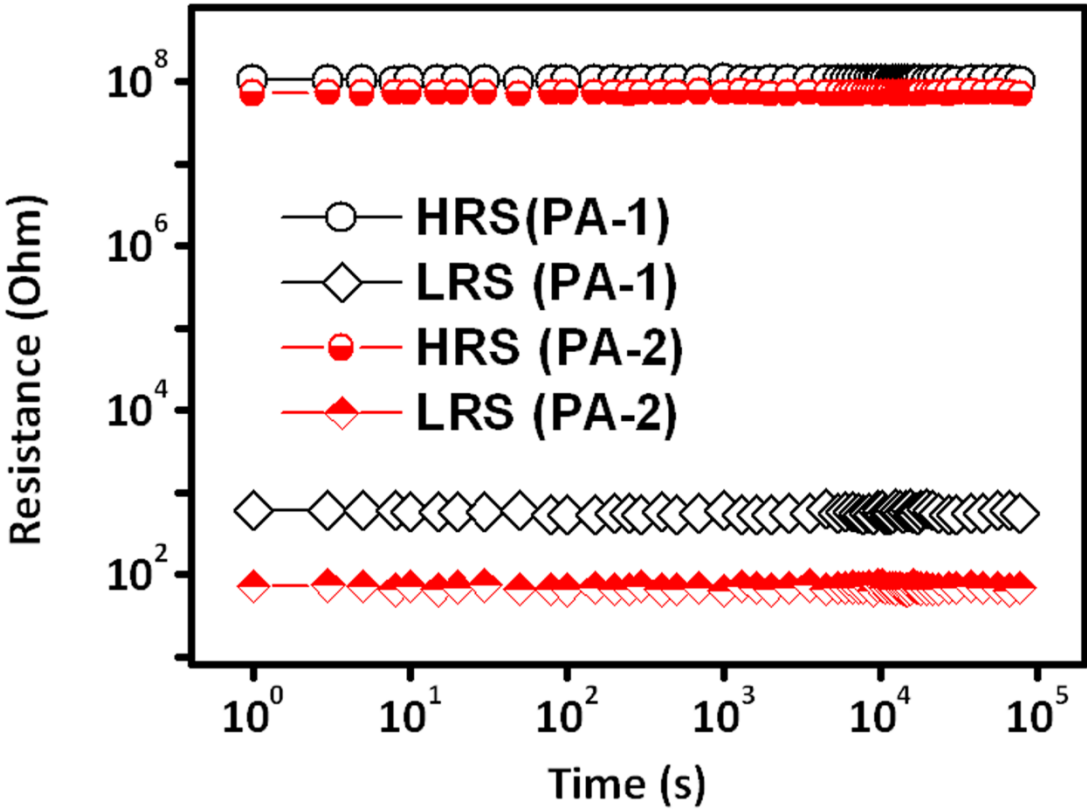

**Figure S3** Retention performance of the Pt/PAs/Pt devices.

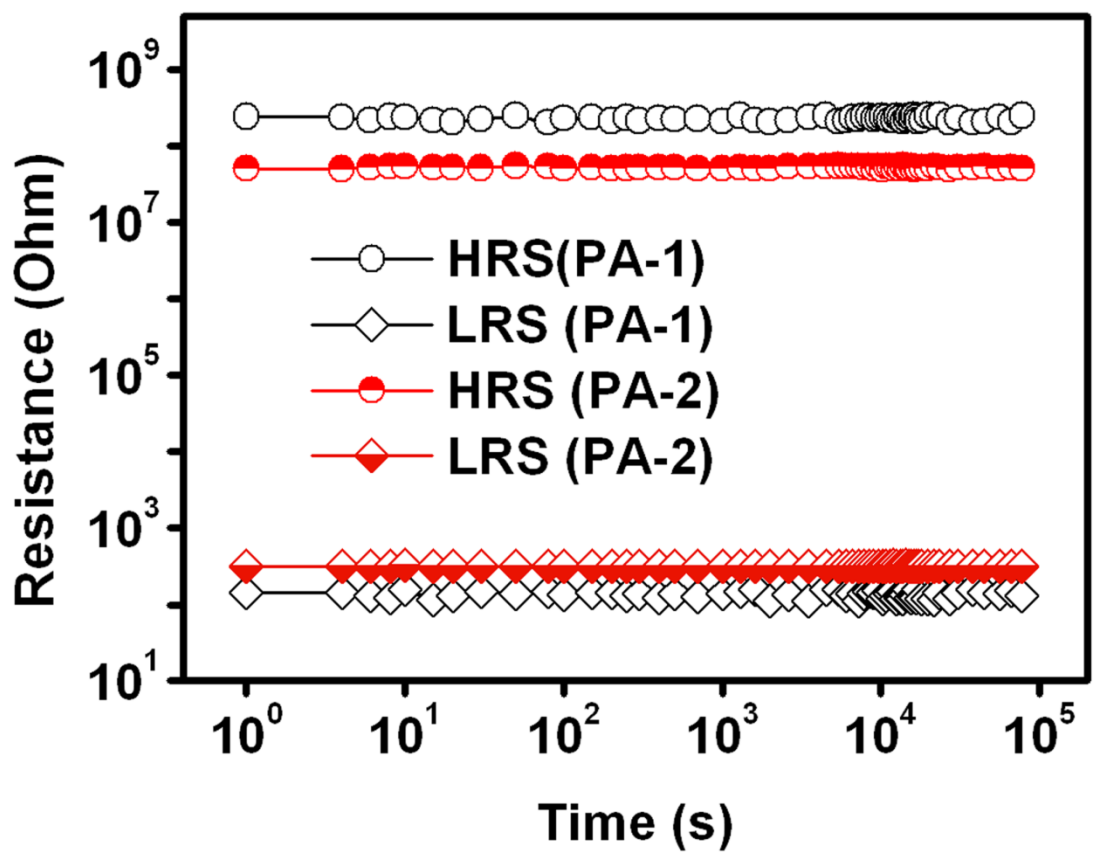

Figure S4 Retention performance of the Al/PAs/Pt devices.

## References

1. B. G. Streetman, B. Sanjay, *Solid State Electronic Devices* 2000 (5<sup>th</sup> ed), 524, New Jersey: Prentice Hall.
2. S. M. Sze, K. K. Ng, *Physics of Semiconductor Devices* 2006 (3<sup>rd</sup> ed), John Wiley & Sons.
3. Q. D. Ling, Y. Song, S. L. Lim, E. Y. H. Teo, Y. P. Tan, C. X. Zhu, D. S. H. Chan, D. L. Kwong, E. T. Kang, K. G. Neoh, *Angew. Chem. Int. Ed.* 2006, **45**, 2947.
4. Q. D. Ling, F. C. Chang, Y. Song, C. X. Zhu, D. J. Liaw, D. S. H. Chan, E. T. Kang, K. G. Neoh, *J. Am. Chem. Soc.* 2006, **128**, 8732.
